# Supplementary material for: Enhanced charge storage capacity and high rate capabilities of Ni2Co-layered double hydroxides/expanded-graphite composites as anodes for Li-ion batteries
Source: Royal Society of Chemistry journal article supplement (doi:10.1039/d3ta00154g), 2023-01-01
Supplement: d3ta00154g1.pdf [file d3ta00154g1.pdf]

## Enhanced charge storage capacity and high rate capabilities of Ni<sub>2</sub>Co-layered double hydroxides/expanded graphite composites as an anode for Li-ion batteries

Ramesh Chandra Sahoo,<sup>a,b</sup> Sreejesh Moolayadukkam,<sup>a</sup> Jun Ho Seok,<sup>c</sup> Sang Uck Lee,<sup>c\*</sup> and H.S.S. Ramakrishna Matte<sup>a,b\*</sup>

a. Energy Materials Laboratory, Centre for Nano and Soft Matter Sciences, Bangalore 562162, India

b. Manipal Academy of Higher Education (MAHE), Manipal 576104, India

c. School of Chemical Engineering, Sungkyunkwan University, Suwon 16149, Republic of Korea

\*Corresponding author: E-mail: [matte@cens.res.in](mailto:matte@cens.res.in), [krishnamatte@gmail.com](mailto:krishnamatte@gmail.com), [suleechem@skku.edu](mailto:suleechem@skku.edu)

### Computational Details and Modelling:

All *ab initio* calculations were performed with the Vienna *Ab initio* Simulation Package (VASP 5.4.4).<sup>1-4</sup> We used the projector augmented wave (PAW) method<sup>5,6</sup> with the generalized gradient approximation based on the Perdew-Burke-Ernzerhof (PBE)<sup>7</sup> functional including the Hubbard *U* correction (GGA+*U*).<sup>8</sup> Plane-wave cutoff energy of 500 eV was used. Lattice constants and internal atomic positions were fully optimized until the residual forces were less than 0.04 eV/Å. The vacuum slab space of a unit cell in the z-direction was set to 20 Å to avoid interactions between layers. To satisfy the experimental transition metal atomic ratio for Ni<sub>2</sub>Co-LDH, a model was constructed using a 3x3 supercell as Ni<sub>6</sub>Co<sub>3</sub>O<sub>18</sub>H<sub>18</sub> containing 9 transition metal sites. The Brillouin zone was performed with a k-point grid of 3 x 3 x 1 based on the Monkhorst-Pack scheme<sup>9</sup> using a k-point mesh with an interval of 0.05 Å<sup>-1</sup>.

### Theoretical capacities calculation:

To quantitatively distinguish the lithium storage ability of  $\text{Ni}_{2/3}\text{Co}_{1/3}(\text{OH})_2$ , we calculated theoretical specific capacity by using the following equation:

$$Q_{\text{theoretical}} = \frac{(nF) \times 1000}{(3600 \times MW)} \text{ mAh/g}$$

where  $n$  is the number of charge carriers,  $F$  is the Faraday constant (96485 C/mol) and  $MW$  is the molecular weight of the  $\text{Ni}_{2/3}\text{Co}_{1/3}(\text{OH})_2$  (92.7871 g/mol). Finally, to use capacity units in mAh/g, multiply by 1000.

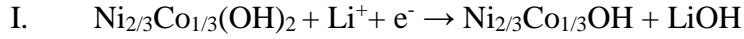

$$Q_{\text{theoretical}} = \frac{1 \times 96485 \times 1000}{(3600 \times 92.7871)} = 289 \text{ mAh/g}$$

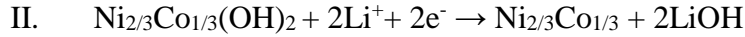

$$Q_{\text{theoretical}} = \frac{2 \times 96485 \times 1000}{(3600 \times 92.7871)} = 578 \text{ mAh/g}$$

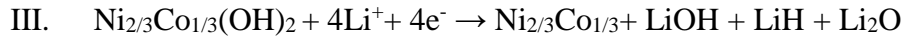

$$Q_{\text{theoretical}} = \frac{4 \times 96485 \times 1000}{(3600 \times 92.7871)} = 1155 \text{ mAh/g}$$

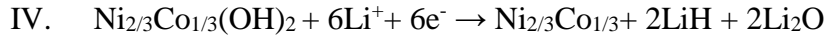

$$Q_{\text{theoretical}} = \frac{6 \times 96485 \times 1000}{(3600 \times 92.7871)} = 1733 \text{ mAh/g}$$

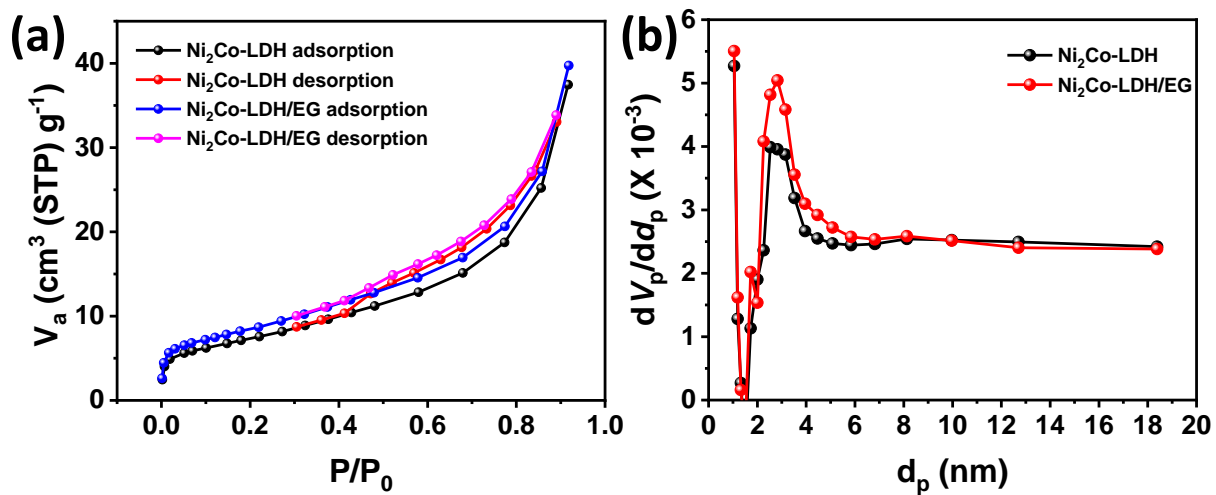

**Fig. S1.** (a) Adsorption-desorption isotherm, (b) BJH pore size distribution of  $\text{Ni}_2\text{Co-LDH}$  and  $\text{Ni}_2\text{Co-LDH/EG}$  composite

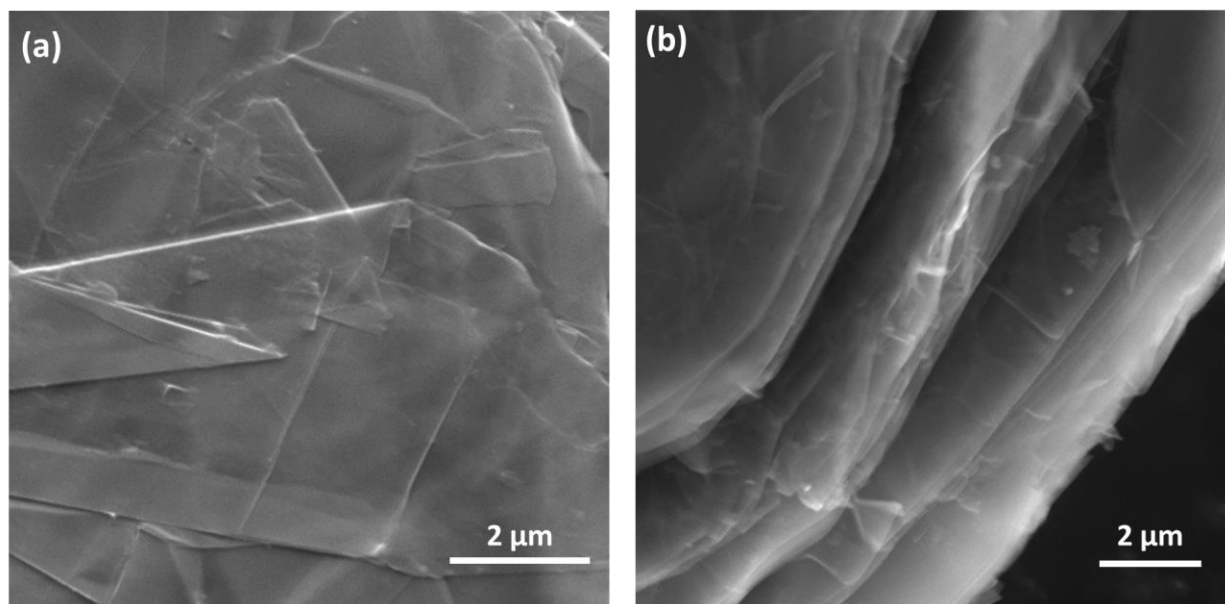

**Fig. S2.** FESEM image of EG (a) in-plane and (b) out of plane

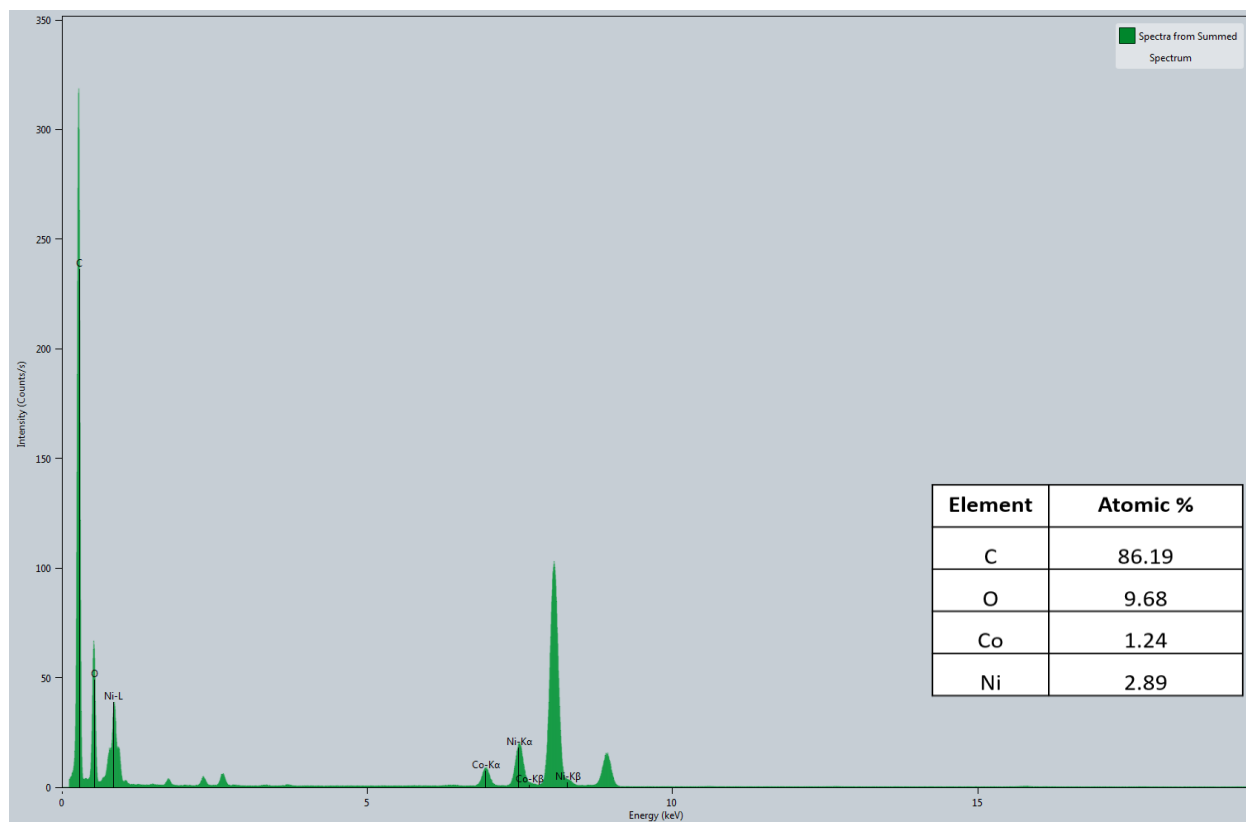

**Fig. S3.** Energy dispersive X-ray spectroscopy (EDS) of Ni<sub>2</sub>Co-LDH/EG composites.

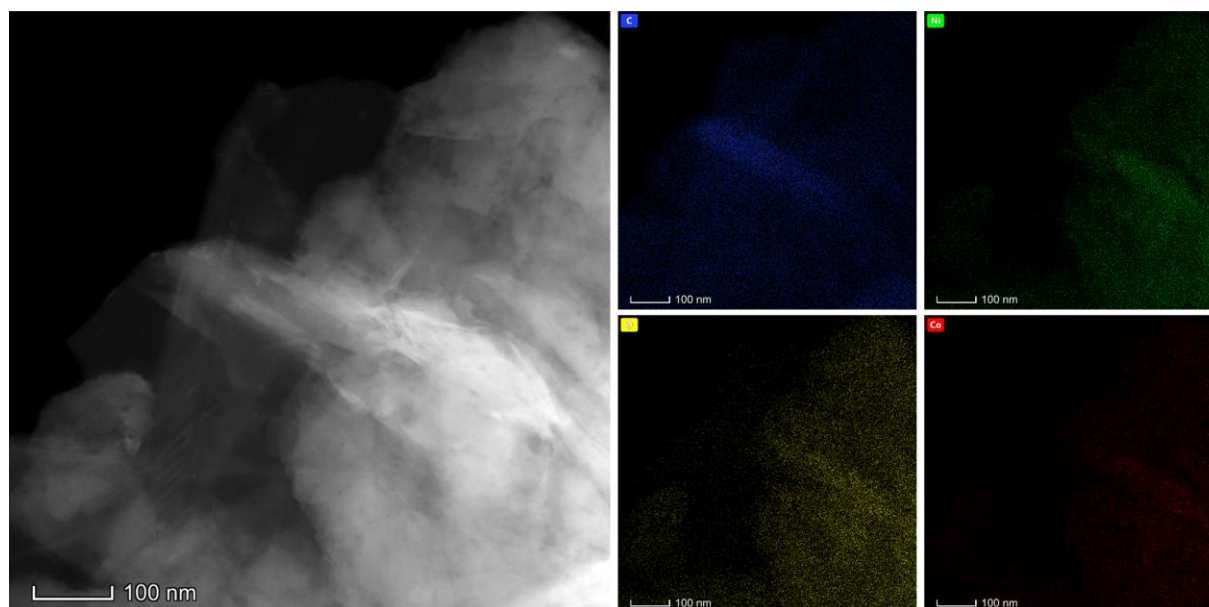

**Fig. S4.** Elemental mapping using HAADF-STEM of Ni<sub>2</sub>Co-LDH/EG composites.

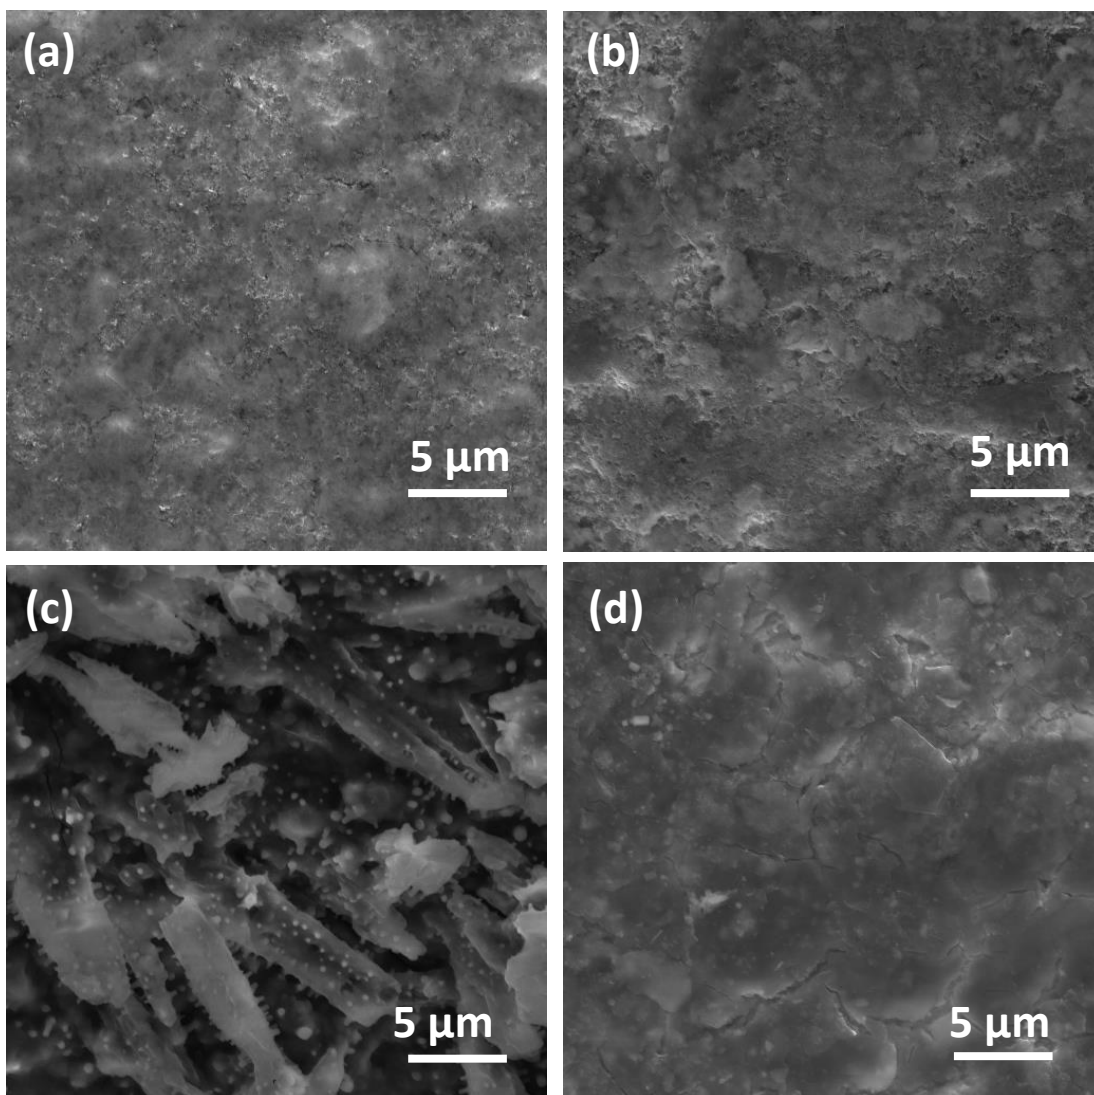

**Fig. S5.** FESEM image before cycling of (a) Ni<sub>2</sub>Co-LDH, (b) Ni<sub>2</sub>Co-LDH/EG composites films, and after cycling for 20 cycles of (c) Ni<sub>2</sub>Co-LDH, (d) Ni<sub>2</sub>Co-LDH/EG composites films.

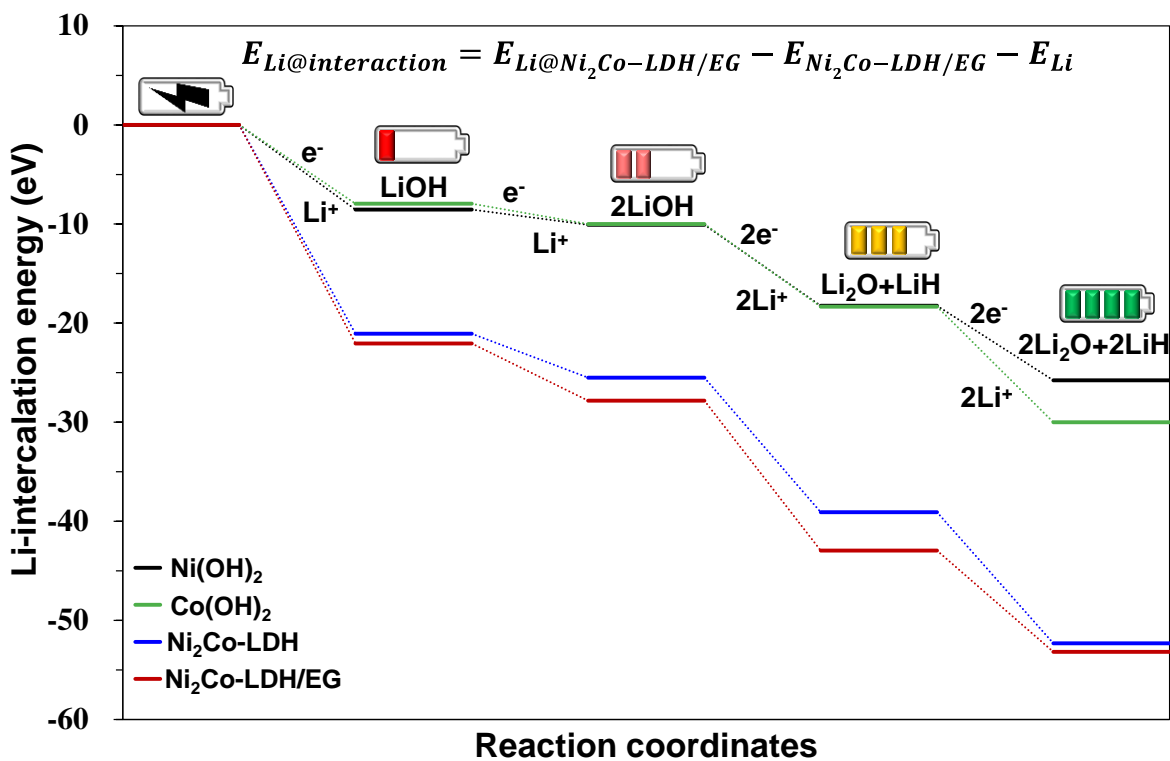

**Fig. S6.** Schematic representation of the Li interaction energy according to the reaction coordinates (up to step4) of Ni(OH)<sub>2</sub>, Co(OH)<sub>2</sub>, Ni<sub>2</sub>Co-LDH, and Ni<sub>2</sub>Co-LDH/EG

## References

1. G. Kresse and J. Hafner, *Phys. Rev. B*, 1993, **48**, 13115.
2. G. Kresse and J. Hafner, *Phys. Rev. B*, 1994, **49**, 14251.
3. G. Kresse and J. Furthmüller, *Comput. Mater. Sci.*, 1996, **6**, 15-50.
4. G. Kresse and J. Furthmüller, *Phys. Rev. B*, 1996, **54**, 11169.
5. P. E. Blöchl, *Phys. Rev. B*, 1994, **50**, 17953.
6. G. Kresse and D. Joubert, *Phys. Rev. B*, 1999, **59**, 1758.
7. J. P. Perdew, K. Burke and M. Ernzerhof, *Phys. Rev. Lett.*, 1996, **77**, 3865.
8. S. L. Dudarev, G. A. Botton, S. Y. Savrasov, C. Humphreys and A. P. Sutton, *Phys. Rev. B*, 1998, **57**, 1505.
9. H. J. Monkhorst and J. D. Pack, *Phys. Rev. B*, 1976, **13**, 5188.
